# Supplementary figures and images for: Associations between trabecular bone score and biochemistry in surgically vs conservatively treated outpatients with primary hyperparathyroidism: A retrospective cohort study
Source: PubMed Central journal article supplement — Bone Rep. 2018 Aug 9;9:101–9. doi: 10.1016/j.bonr.2018.08.001 (PMC6092478; doi:10.1016/j.bonr.2018.08.001), 2018-08-09

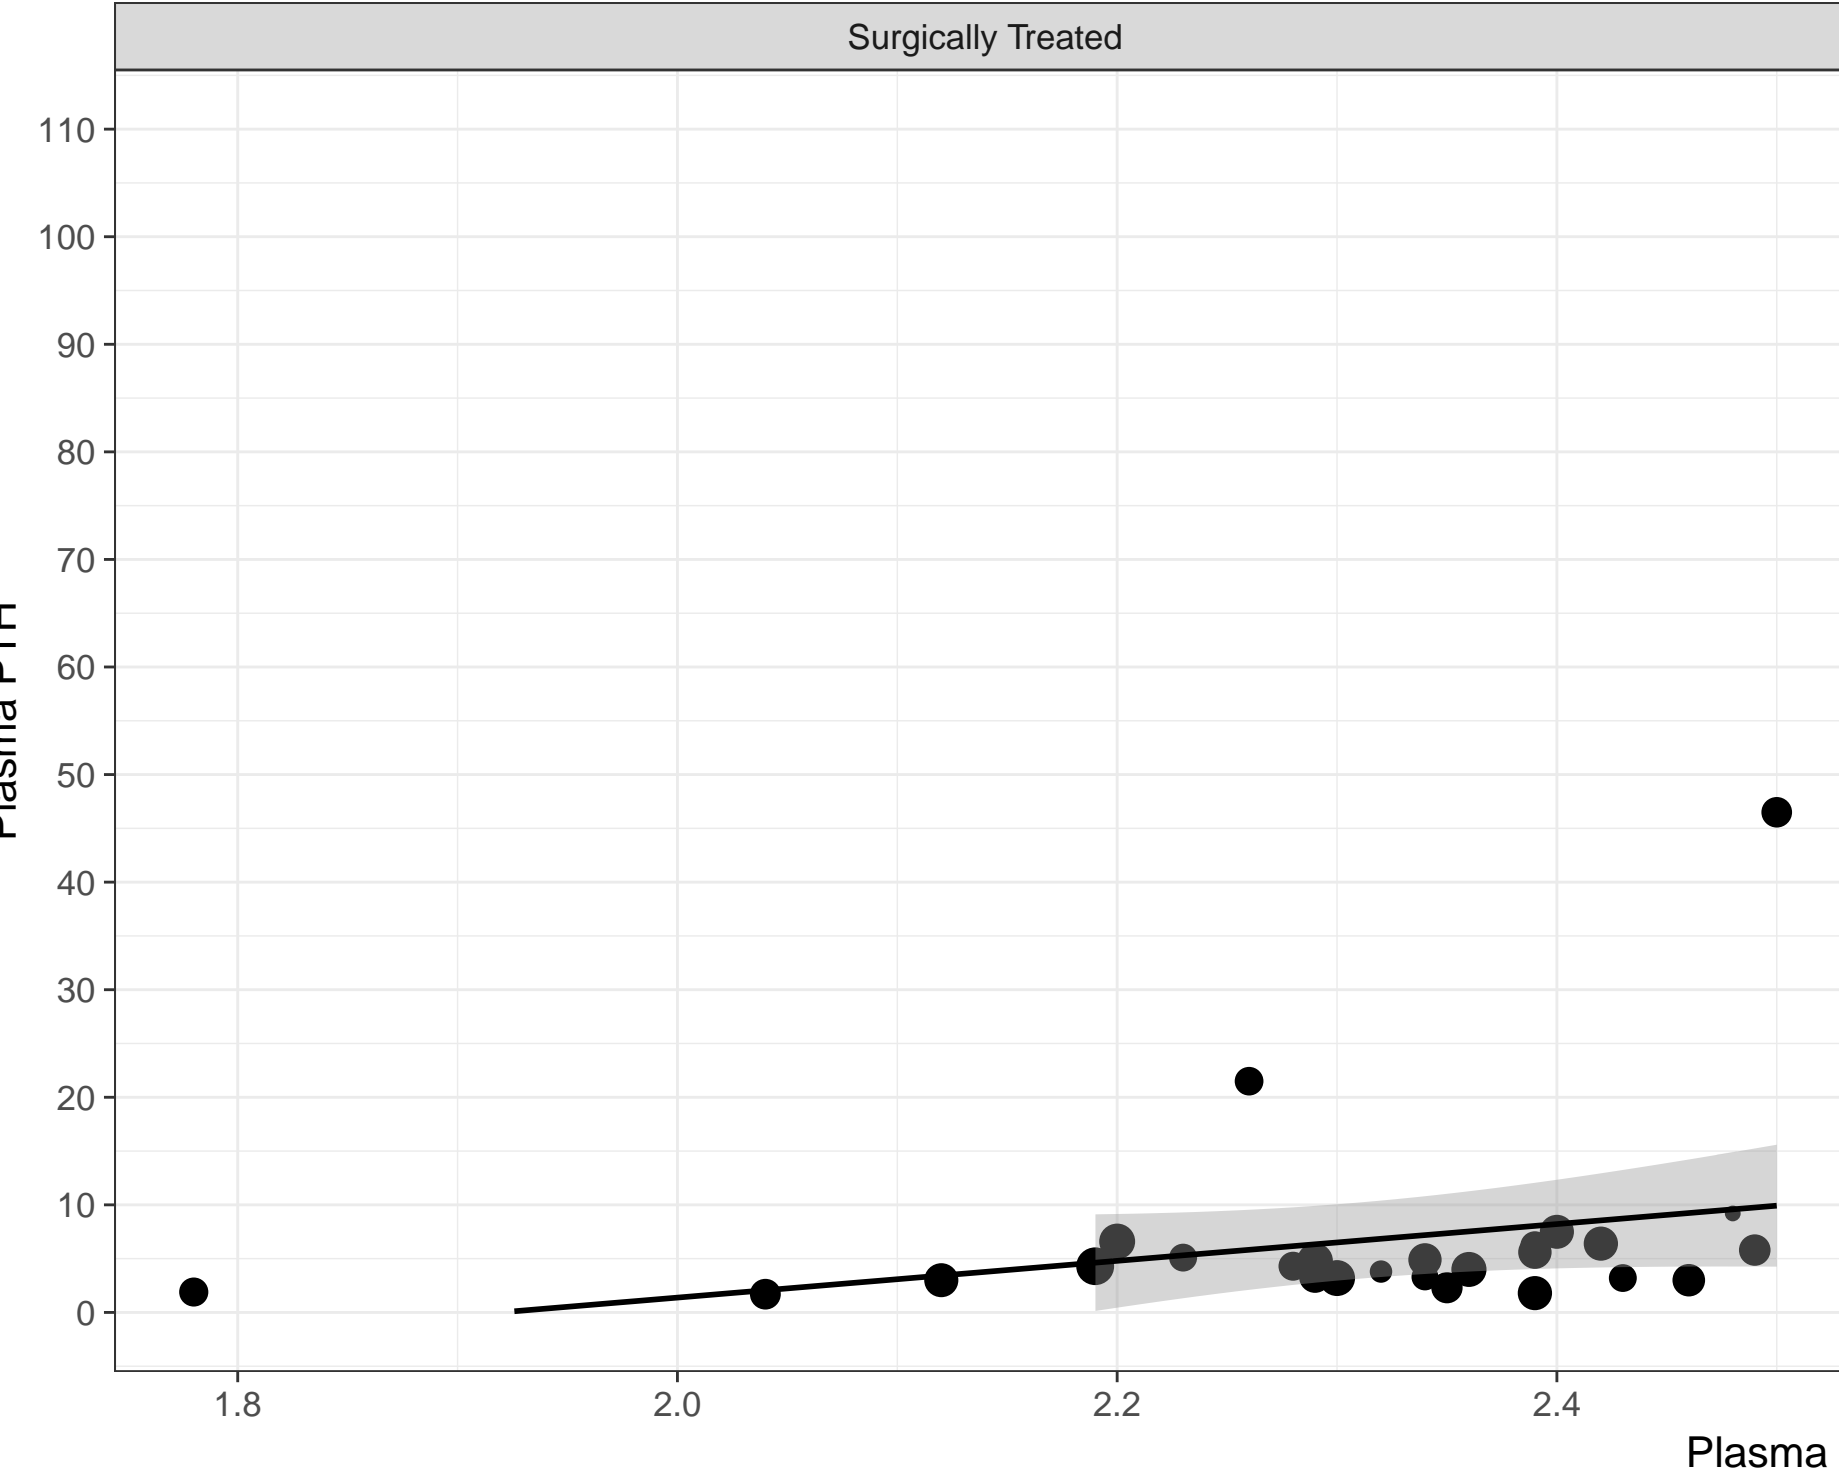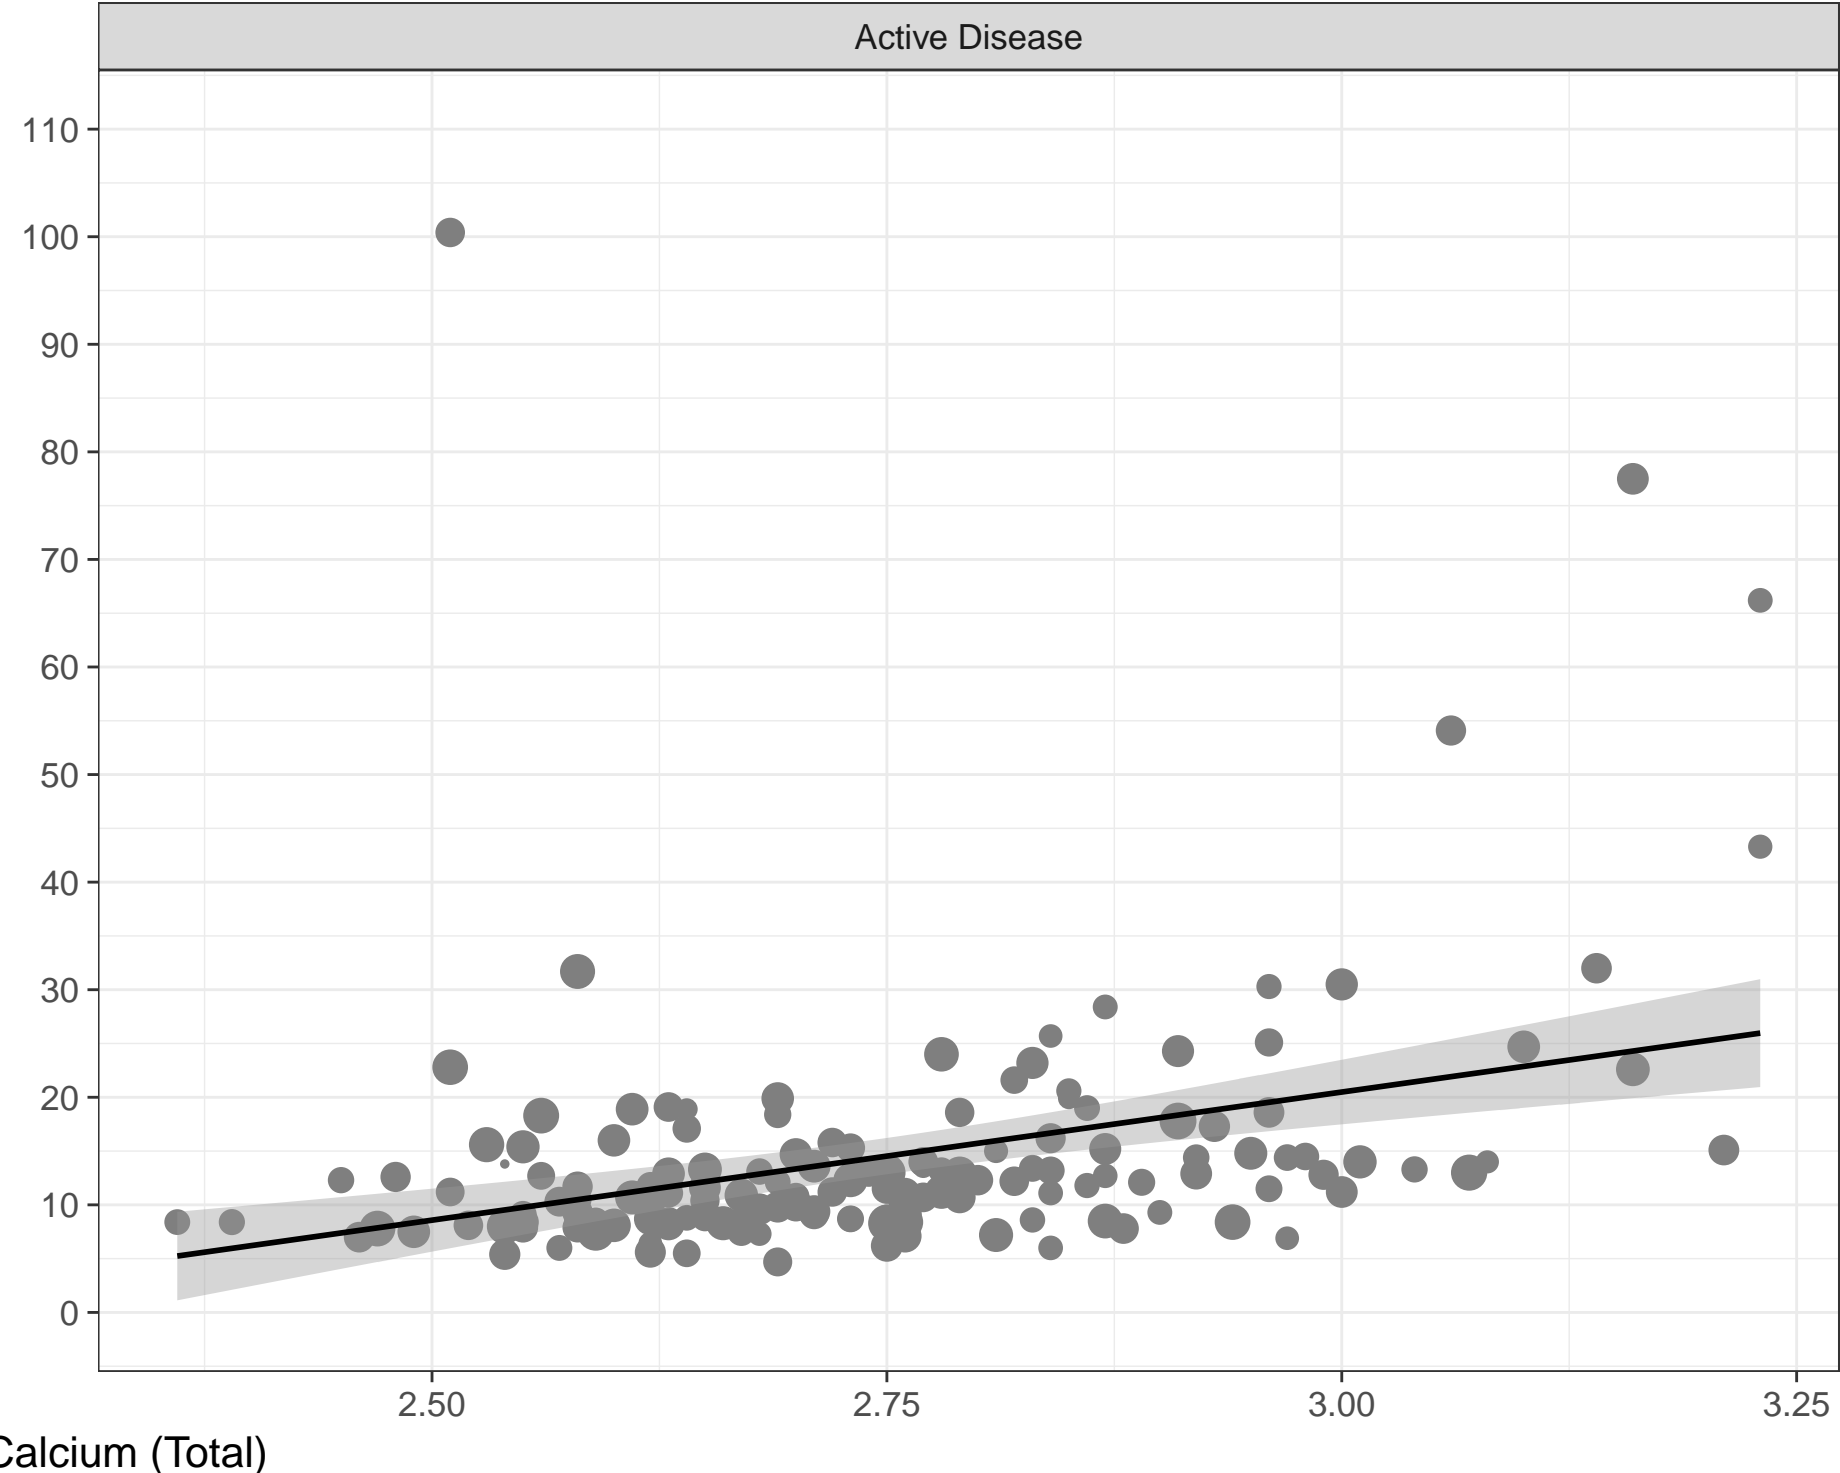

Gruppe • Surgically Treated • Active Disease

TBS L1-L4 • 1.0 • 1.2 • 1.4 • 1.1 • 1.3 • 1.5

Supplement: mmc4.pdf [file mmc4.pdf]
